# Supplementary material for: Mass spectrometric analysis of bioactive conditioned media of bacteria isolated from reptilian gut
Source: Future Sci OA. 2023 May 2;9(5):FSO861. doi: 10.2144/fsoa-2023-0030 (PMC10167718; doi:10.2144/fsoa-2023-0030)
Supplement: Supplementary file 1 [file fsoa-09-861-s1.xlsx]

## Sheet: Sheet2
RT [min]	m/z meas.	M meas.	Ions	m/z PPM	MS/MS	Name	Molecular Formula					Flags	Annotations	AQ	Annotation Source	Boxplot	Include	CM1_a	CM1_b	CM1_C	CM2_a	CM2_b	CM2_c
13.94	245.175	244.168	[M+H]+	-0.982931	TRUE	1,11-Undecanedicarboxylic acid	C13H24O4					[]	Analyte List -HMBD	2110	HMBD	3784	TRUE	792	582	940	3726	4246	3784
10.53	169.086	168.079	[M+H]+, [M+Na]+	0.986146	TRUE	1,3,5-Trimethoxybenzene	C9H12O3					[]	Analyte List -HMBD	2220	HMBD	2230	TRUE	82852	84210	83202	312272	290792	307206
12.81	211.085	210.078	[M+H]+	-3.52348	TRUE	1,3,7-Trimethyluric acid	C8H10N4O3					[]	Analyte List -HMBD	1100	HMBD	654	TRUE	5000	4576	4208	0	0	0
8.84	179.058	196.06	[M-H2O+H]+, [M+Na]+, [M+H]+	2.80454	TRUE	1,3-Dimethyluric acid	C7H8N4O3					[]	Analyte List -HMBD	2120	HMBD	456	TRUE	0	0	0	85000	79978	86572
9.61	331.218	330.211	[M+H]+, [M+H+H]2+	-1.80135	TRUE	11a-Hydroxyprogesterone	C21H30O3					[]	Analyte List -HMBD	1100	HMBD	1584	TRUE	4256	4568	4486	1734	1370	1872
16.76	199.17	216.173	[M-H2O+H]+, [M+H]+	2.38405	TRUE	12-Hydroxydodecanoic acid	C12H24O3					[]	Analyte List -HMBD	2110	HMBD	0	TRUE	6414	9236	10436	0	650	0
7.08	297.188	296.181	[M+H]+	4.86187	TRUE	17a-Ethynylestradiol	C20H24O2					[]	Analyte List -HMBD	2110	HMBD	1546	TRUE	644	914	638	2172	1742	2058
13.34	331.225	330.218	[M+H]+	-4.1028	TRUE	17-Hydroxyprogesterone	C21H30O3					[]	Analyte List -HMBD	2100	HMBD	1124	TRUE	1056	984	1058	1008	1456	1340
16.44	57.0701	74.0745	[M-H2O+H]+, [M+Na]+	4.38828	TRUE	1-Butanol	C4H10O					[]	Analyte List -HMBD	2020	HMBD	17140	TRUE	17642	16898	16232	18238	16210	19140
6.84	282.126	281.119	[M+H]+	-2.25524	TRUE	1-Methyladenosine	C11H15N5O4					[]	Analyte List -HMBD	1100	HMBD	1026	TRUE	0	298	0	1186	1330	1370
14.33	170.097	169.089	[M+H]+	2.03082	TRUE	1-Methylhistidine	C7H11N3O2					[]	Analyte List -HMBD	1100	HMBD	1102	TRUE	880	780	730	1142	1514	1514
5.76	105.07	104.063	[M+H]+	1.84975	TRUE	2,3-Diaminopropionic acid	C3H8N2O2					[]	Analyte List -HMBD	1110	HMBD	5340	TRUE	7166	5340	5944	364808	138126	154404
9.69	138.056	137.049	[M+H]+	2.71091	TRUE	2-Aminobenzoic acid	C7H7NO2					[]	Analyte List -HMBD	2200	HMBD	246	TRUE	248	256	170	4968	5132	5700
1.12	113.029	112.022	[M+H]+	0.142883	TRUE	2-Furoic acid	C5H4O3					[]	Analyte List -HMBD	1100	HMBD	1234	TRUE	1234	1564	1346	890	720	742
21.12	157.017	118.053	[M+K]+, [M+Na]+	4.5388	TRUE	2-Hydroxy-3-methylbutyric acid	C5H10O3					[]	Analyte List -HMBD	1100	HMBD	4706	TRUE	4384	4706	4262	4472	5200	5544
1.12	152.057	151.049	[M+H]+	0.530906	TRUE	2-Hydroxyadenine	C5H5N5O					[]	Analyte List -HMBD	2200	HMBD	748	TRUE	0	748	0	3026	2926	2926
21.11	143.002	104.037	[M+K]+, [M+Na]+	-4.07663	TRUE	2-Hydroxybutyric acid	C4H8O3					[]	Analyte List -HMBD	1100	HMBD	4760	TRUE	3660	5484	2940	3410	4798	3734
12.14	133.086	132.079	[M+H]+	-0.183603	TRUE	2-Hydroxycaproic acid	C6H12O3					[]	Analyte List -HMBD	2110	HMBD	1052	TRUE	2436	2372	3036	0	446	272
1.36	138.091	137.084	[M+H]+	0.554558	TRUE	2-Hydroxyphenethylamine	C8H11NO					[]	Analyte List -HMBD	2120	HMBD	0	TRUE	0	0	0	194386	179562	176062
8.62	177.076	176.069	[M+H]+	3.10394	TRUE	2-Isopropylmalic acid	C7H12O5					[]	Analyte List -HMBD	2100	HMBD	1004	TRUE	2198	2162	0	4334	5520	4220
14.71	143.107	142.1	[M+H]+, [M-H2O+H]+	1.62075	TRUE	2-Octenoic acid	C8H14O2					[]	Analyte List -HMBD	2120	HMBD	1070	TRUE	15790	16908	16014	0	0	0
9.93	239.091	238.084	[M+H]+	-2.11504	TRUE	3,4,5-Trimethoxycinnamic acid	C12H14O5					[]	Analyte List -HMBD	2210	HMBD	3868	TRUE	3868	4184	3968	502	498	560
11.8	171.065	170.058	[M+H]+	-0.639829	TRUE	3,4-Dihydroxyphenylglycol	C8H10O4					[]	Analyte List -HMBD	2120	HMBD	0	TRUE	6204	5558	6858	0	394	262
11.68	155.072	154.065	[M+H]+	3.28314	TRUE	3,5-Dimethoxyphenol	C8H10O3					[]	Analyte List -HMBD	2100	HMBD	236	TRUE	130	0	100	2018	2304	1942
1.19	163.06	162.053	[M+H]+	0.966166	TRUE	3-Hydroxymethylglutaric acid	C6H10O5					[]	Analyte List -HMBD	2100	HMBD	428	TRUE	1648	1348	1426	0	0	0
10.36	190.087	189.079	[M+H]+, [M-H2O+H]+	2.01714	TRUE	3-Indolepropionic acid	C11H11NO2					[]	Analyte List -HMBD	2210	HMBD	326	TRUE	0	0	0	19196	19940	16846
14.2	167.07	166.063	[M+H]+	0.0350108	TRUE	3-Methoxyphenylacetic acid	C9H10O3					[]	Analyte List -HMBD	2120	HMBD	4666	TRUE	4666	4564	3758	5042	7410	6144
5.9	131.07	130.063	[M+H]+	0.506016	TRUE	3-Methyl-2-oxovaleric acid	C6H10O3					[]	Analyte List -HMBD	2220	HMBD	2174	TRUE	2174	2682	2752	422	536	422
7.34	132.081	131.074	[M+H]+	1.14979	TRUE	3-Methylindole	C9H9N					[]	Analyte List -HMBD	2120	HMBD	628	TRUE	3482	0	2634	71054	71686	71182
14.04	227.064	226.057	[M+H]+	0.878363	TRUE	3-Nitrotyrosine	C9H10N2O5					[]	Analyte List -HMBD	2100	HMBD	394	TRUE	0	226	180	1822	1806	2028
2.31	167.076	166.069	[M+H]+	0.396305	TRUE	3-Phenoxypropionic acid	C9H10O3					[]	Analyte List -HMBD	1110	HMBD	606	TRUE	506	512	0	31934	46888	40154
10.03	159.044	158.037	[M+H]+	4.80903	TRUE	4,5-Dihydroorotic acid	C5H6N2O4					[]	Analyte List -HMBD	1110	HMBD	2018	TRUE	2164	2456	2340	13204	12820	15682
8.39	195.082	194.075	[M+H]+	4.47151	TRUE	4-Aminohippuric acid	C9H10N2O3					[]	Analyte List -HMBD	1100	HMBD	296	TRUE	1348	0	1282	232	0	296
7.37	110.06	109.053	[M+H]+	0.331482	TRUE	4-Aminophenol	C6H7NO					[]	Analyte List -HMBD	2120	HMBD	10804	TRUE	10804	12572	12208	2606	2428	2050
16.45	199.17	198.162	[M+H]+, [M-H2O+H]+	-4.79403	TRUE	5-Dodecenoic acid	C12H22O2					[]	Analyte List -HMBD	2220	HMBD	6330	TRUE	6274	6190	6140	7022	6784	6694
7.64	192.057	191.05	[M+H]+	-2.21491	TRUE	5-Hydroxyindoleacetic acid	C10H9NO3					[]	Analyte List -HMBD	1110	HMBD	5504	TRUE	1774	2314	2236	1392	9030	10958
9.44	243.074	220.086	[M+Na]+, [M+K]+, [M+H]+	4.03363	TRUE	5-Hydroxy-L-tryptophan	C11H12N2O3					[]	Analyte List -HMBD	2110	HMBD	4504	TRUE	4896	5012	4504	0	0	0
7.34	178.086	177.079	[M+H]+	-0.669763	TRUE	5-Hydroxytryptophol	C10H11NO2					[]	Analyte List -HMBD	2120	HMBD	10124	TRUE	15454	14102	12980	215332	236330	213860
7.67	191.118	190.111	[M+H]+	0.983217	TRUE	5-Methoxytryptamine	C11H14N2O					[]	Analyte List -HMBD	2110	HMBD	6076	TRUE	2280	2840	2286	6860	6076	5830
13.03	235.1	234.093	[M+H]+	-1.47131	TRUE	5-Methoxytryptophan	C12H14N2O3					[]	Analyte List -HMBD	1110	HMBD	8460	TRUE	2502	2632	1808	12852	11840	12172
6.87	192.102	191.095	[M+H]+	0.582617	TRUE	5-Methoxytryptophol	C11H13NO2					[]	Analyte List -HMBD	2110	HMBD	812	TRUE	718	482	614	4550	4810	6888
5.96	298.097	297.09	[M+H]+	0.302734	TRUE	5'-Methylthioadenosine	C11H15N5O3S					[]	Analyte List -HMBD	2220	HMBD	4442	TRUE	4442	5730	4990	752	684	0
13.23	179.107	178.1	[M+H]+	1.46159	TRUE	5-Phenylvaleric acid	C11H14O2					[]	Analyte List -HMBD	2120	HMBD	1734	TRUE	1016	1536	854	1734	2232	2190
5.02	164.093	163.086	[M+H]+	1.43904	TRUE	6-Dimethylaminopurine	C7H9N5					[]	Analyte List -HMBD	2220	HMBD	59956	TRUE	62592	61698	67982	53926	65546	57934
2.47	150.077	149.07	[M+H]+	-3.45642	TRUE	6-Methyladenine	C6H7N5					[]	Analyte List -HMBD	2100	HMBD	400	TRUE	1508	1306	1648	1134	0	0
7.13	299.13	298.123	[M+H]+	-1.17401	TRUE	7-Methylguanosine	C11H16N5O5					[]	Analyte List -HMBD	1000	HMBD	702	TRUE	730	698	654	0	0	26468
9.44	152.071	151.063	[M+H]+, [M-H2O+H]+	-0.917079	TRUE	Acetaminophen	C8H9NO2					[]	Analyte List -HMBD	2120	HMBD	27378	TRUE	38168	36582	39356	816	1540	550
21.69	61.0285	60.0212	[M+H]+	1.50993	TRUE	Acetic acid	C2H4O2					[]	Analyte List -HMBD	2020	HMBD	112480	TRUE	113846	109014	106398	116204	107766	113966
7.2	136.062	135.054	[M+H]+	-0.0383919	TRUE	Adenine	C5H5N5					[]	Analyte List -HMBD	2120	HMBD	7210	TRUE	8518	7226	7210	3314	2860	3310
12.92	177.055	176.047	[M+H]+	-1.70408	TRUE	Allantoic acid	C4H8N4O4					[]	Analyte List -HMBD	1120	HMBD	8612	TRUE	4726	3610	4962	12404	13710	10846
0.82	143.017	142.01	[M+H]+	2.18295	TRUE	Alloxan	C4H2N2O4					[]	Analyte List -HMBD	1210	HMBD	3240	TRUE	2972	2718	3278	2360	3012	2750
11.69	100.022	99.0145	[M+H]+	2.02138	TRUE	Allyl isothiocyanate	C4H5NS					[]	Analyte List -HMBD	2120	HMBD	6886	TRUE	8078	6886	8446	0	0	0													https://link.springer.com/article/10.1007%2Fs00125-007-0886-7
13.5	262.142	261.135	[M+H]+	-3.06354	TRUE	Alpha-Aspartyl-lysine	C10H19N3O5					[]	Analyte List -HMBD	1110	HMBD	192	TRUE	316	0	100	4732	4794	4370
6.13	117.057	116.05	[M+H]+	1.17086	TRUE	Alpha-ketoisovaleric acid	C5H8O3					[]	Analyte List -HMBD	1100	HMBD	3054	TRUE	334	338	502	7886	7236	6724
1.11	265.112	264.105	[M+H]+	0.186665	TRUE	Alpha-N-phenylacetyl-L-glutamine	C13H16N2O4					[]	Analyte List -HMBD	1110	HMBD	76446	TRUE	71632	60778	65984	76446	80174	83948
11.18	155.143	154.136	[M+H]+	0.225788	TRUE	Alpha-Terpineol	C10H18O					[]	Analyte List -HMBD	2220	HMBD	186	TRUE	154	126	236	3004	2322	2328
10.06	94.0653	93.058	[M+H]+	1.83511	TRUE	Aniline	C6H7N					[]	Analyte List -HMBD	2120	HMBD	2696	TRUE	3122	2696	3002	0	0	0
6.89	107.049	106.042	[M+H]+	2.40646	TRUE	Benzaldehyde	C7H6O					[]	Analyte List -HMBD	2020	HMBD	1514	TRUE	172	96	170	7382	6362	5676
9.79	122.066	121.058	[M+H]+	-3.74901	TRUE	Benzamide	C7H7NO					[]	Analyte List -HMBD	1100	HMBD	624	TRUE	2804	3012	3092	856	1070	798
18.17	79.0544	78.0472	[M+H]+	2.68823	TRUE	Benzene	C6H6					[]	Analyte List -HMBD	2100	HMBD	1034	TRUE	1034	1020	0	1360	1686	1610
2.29	165.091	164.084	[M+H]+	2.44005	TRUE	Benzenebutanoic acid	C10H12O2					[]	Analyte List -HMBD	2100	HMBD	110	TRUE	0	272	80	1950	2152	1942
8.01	166.086	165.079	[M+H]+, [M+Na]+	-1.50595	TRUE	Benzocaine	C9H11NO2					[]	Analyte List -HMBD	2100	HMBD	1272	TRUE	1272	1128	1544	55188	51118	49148
1.09	118.086	117.079	[M+H]+	1.29314	TRUE	Betaine	C5H11NO2					[]	Analyte List -HMBD	2220	HMBD	3596	TRUE	9958	6620	6394	874	852	1050
21.68	73.065	72.0577	[M+H]+	3.1242	TRUE	Butanone	C4H8O					[]	Analyte List -HMBD	2100	HMBD	3014	TRUE	3156	2750	2582	3358	3344	4000													https://www.frontiersin.org/articles/10.3389/fimmu.2018.01070/full
6.78	195.088	194.08	[M+H]+	0.434954	TRUE	Caffeine	C8H10N4O2					[]	Analyte List -HMBD	2210	HMBD	8366	TRUE	5076	4574	5202	4018	4190	4302
8.6	133.068	132.061	[M+H]+	4.96079	TRUE	Cinnamaldehyde	C9H8O					[]	Analyte List -HMBD	1100	HMBD	1580	TRUE	656	594	970	2646	2908	2382
5.3	149.06	148.052	[M+H]+, [M-H2O+H]+	0.0709208	TRUE	Cinnamic acid	C9H8O2					[]	Analyte List -HMBD	2120	HMBD	21012	TRUE	4694	4264	4694	704	520	560
6.2	143.034	142.027	[M+H]+	-0.62439	TRUE	Cis,cis-Muconic acid	C6H6O4					[]	Analyte List -HMBD	2200	HMBD	1842	TRUE	1896	1962	1842	302	348	178
1.81	175.019	174.011	[M+H]+, [M+H]+	-0.160472	TRUE	Cis-Aconitic acid	C6H6O6					[]	Analyte List -HMBD	1200	HMBD	1728	TRUE	2390	2454	2134	1530	1746	0
8.59	149.045	148.037	[M+H]+	2.00378	TRUE	Citramalic acid	C5H8O5					[]	Analyte List -HMBD	2100	HMBD	1566	TRUE	1428	1592	1566	0	1476	1116
8.87	81.0701	98.0734	[M-H2O+H]+, [M+H]+	2.49873	TRUE	Cyclohexanone	C6H10O					[]	Analyte List -HMBD	2020	HMBD	36254	TRUE	37332	36254	41998	2254	1868	1712
6.77	78.0375	77.0302	[M+H]+	4.15528	TRUE	Cysteamine	C2H7NS					[]	Analyte List -HMBD	2120	HMBD	290	TRUE	116	110	190	26830	21444	21426
9.02	266.083	243.093	[M+Na]+, [M+H]+	-1.15405	TRUE	Cytidine	C9H13N3O5					[]	Analyte List -HMBD	1110	HMBD	0	TRUE	0	0	0	27868	28940	30648
8.95	324.056	323.049	[M+H]+	-0.281539	TRUE	Cytidine monophosphate	C9H14N3O8P					[]	Analyte List -HMBD	1100	HMBD	590	TRUE	1202	1338	1134	0	0	0
3.53	255.068	254.06	[M+H]+	1.57915	TRUE	Daidzein	C15H10O4					[]	Analyte List -HMBD	1100	HMBD	0	TRUE	1664	1516	2040	0	0	0
13.73	274.091	251.102	[M+Na]+, [M+H]+, [M+K]+	-0.315836	TRUE	Deoxyadenosine	C10H13N5O3					[]	Analyte List -HMBD	2120	HMBD	13980	TRUE	7874	9932	7660	34032	34982	35280
18.4	450.321	449.314	[M+H]+	-0.541917	TRUE	Deoxycholic acid glycine conjugate	C26H43NO5					[]	Analyte List -HMBD	2100	HMBD	1598	TRUE	1796	0	2218	822	1074	1154
7.79	228.104	227.096	[M+H]+	-1.25902	TRUE	Deoxycytidine	C9H13N3O4					[]	Analyte List -HMBD	1100	HMBD	1002	TRUE	1032	1002	1064	730	860	928
4.7	268.104	267.097	[M+H]+	1.33312	TRUE	Deoxyguanosine	C10H13N5O4					[]	Analyte List -HMBD	2200	HMBD	1072	TRUE	1718	2058	1990	234	246	156
6.61	253.101	252.094	[M+H]+	-1.2094	TRUE	Deoxyinosine	C10H12N4O4					[]	Analyte List -HMBD	1110	HMBD	114	TRUE	260	248	0	58970	53714	54152
8.4	229.074	228.067	[M+H]+	-0.357369	TRUE	Deoxyuridine	C9H12N2O5					[]	Analyte List -HMBD	1110	HMBD	12396	TRUE	13044	12712	12396	0	152	0
14.45	272.201	271.194	[M+H]+	0.647408	TRUE	Dextromethorphan	C18H25NO					[]	Analyte List -HMBD	2110	HMBD	1276	TRUE	6120	5910	6290	0	0	0
2.37	177.034	176.027	[M+H]+	0.522715	TRUE	D-Glucurono-6,3-lactone	C6H8O6					[]	Analyte List -HMBD	1100	HMBD	772	TRUE	1080	1024	1228	562	606	526
11.5	87.0442	86.0369	[M+H]+	1.86623	TRUE	Diacetyl	C4H6O2					[]	Analyte List -HMBD	2110	HMBD	1372	TRUE	720	590	866	1162	840	1372
11.39	256.17	255.162	[M+H]+	0.531822	TRUE	Diphenhydramine	C17H21NO					[]	Analyte List -HMBD	2110	HMBD	49734	TRUE	54828	64394	66230	3946	3644	3498
0.83	173.028	172.02	[M+H]+	-1.6005	TRUE	DL-a-glycerophosphate	C3H9O6P					[]	Analyte List -HMBD	1000	HMBD	5778	TRUE	5830	5778	4984	3414	5444	6004
6.11	269.058	268.051	[M+H]+	-3.6873	TRUE	DL-Homocystine	C8H16N2O4S2					[]	Analyte List -HMBD	1100	HMBD	2988	TRUE	3252	3354	3224	0	0	0
18.15	283.264	282.256	[M+H]+, [M-H2O+H]+	1.41598	TRUE	Elaidic acid	C18H34O2					[]	Analyte List -HMBD	2010	HMBD	87440	TRUE	94040	96640	97018	64322	73090	73476
4.65	121.04	120.032	[M+H]+	0.926884	TRUE	Erythrose	C4H8O4					[]	Analyte List -HMBD	1010	HMBD	2798	TRUE	3590	3256	2798	1684	1704	2388
16.26	273.185	272.179	[M+H]+, [M+Na]+	3.63729	TRUE	Estradiol	C18H24O2					[]	Analyte List -HMBD	2100	HMBD	2992	TRUE	2752	3078	1872	3340	2924	2784
5.02	271.166	270.159	[M+H]+, [M+K]+, [M+Na]+	-1.40639	TRUE	Estrone	C18H22O2					[]	Analyte List -HMBD	1120	HMBD	0	TRUE	0	0	0	94830	109364	84068
0.71	197.073	196.066	[M+H]+	0.763653	TRUE	Galactonic acid	C6H12O7					[]	Analyte List -HMBD	1210	HMBD	2384	TRUE	2892	2384	2454	252	1524	1880
11.81	137.133	136.125	[M+H]+	1.83278	TRUE	Gamma-terpinene	C10H16					[]	Analyte List -HMBD	2220	HMBD	1914	TRUE	8076	8618	9846	562	576	720
8.29	179.064	178.057	[M+H]+	-0.999973	TRUE	Gluconolactone	C6H10O6					[]	Analyte List -HMBD	1110	HMBD	22616	TRUE	11966	15872	14208	21882	26202	25460
7.65	258.112	257.105	[M+H]+	0.91649	TRUE	Glycerophosphocholine	C8H20NO6P					[]	Analyte List -HMBD	1100	HMBD	2134	TRUE	2358	2134	3140	0	0	0
8.47	173.085	172.077	[M+H]+	-0.0536154	TRUE	Glycylproline	C7H12N2O3					[]	Analyte List -HMBD	1120	HMBD	3466	TRUE	1894	1628	1452	5576	4626	4950
6.86	199.093	198.085	[M+H]+	0.611171	TRUE	Guaifenesin	C10H14O4					[]	Analyte List -HMBD	1200	HMBD	1696	TRUE	1954	1696	1500	7904	7262	7564
1.28	118.068	117.061	[M+H]+	2.84909	TRUE	Guanidoacetic acid	C3H7N3O2					[]	Analyte List -HMBD	1220	HMBD	0	TRUE	0	0	0	4886	3476	4298
4.46	152.057	151.05	[M+H]+, [M+Na]+	1.59016	TRUE	Guanine	C5H5N5O					[]	Analyte List -HMBD	2120	HMBD	11742	TRUE	10938	13136	12726	12186	11484	11348
11.19	271.264	270.256	[M+H]+	2.21889	TRUE	Heptadecanoic acid	C17H34O2					[]	Analyte List -HMBD	2000	HMBD	1196	TRUE	1046	0	1314	1078	1220	1358
4.77	180.064	179.056	[M+H]+	-4.93227	TRUE	Hippuric acid	C9H9NO3					[]	Analyte List -HMBD	2100	HMBD	1180	TRUE	1416	1902	1326	194	244	0
8.95	136.043	135.035	[M+H]+	-1.1051	TRUE	Homocysteine	C4H9NO2S					[]	Analyte List -HMBD	2100	HMBD	810	TRUE	1706	1634	1866	484	500	810
10.99	197.071	196.064	[M+H]+	1.84189	TRUE	Homoveratric acid	C10H12O4					[]	Analyte List -HMBD	1120	HMBD	86574	TRUE	89000	86574	91312	0	0	0
20.37	393.299	392.291	[M+H]+	-2.95638	TRUE	Hyodeoxycholic acid	C24H40O4					[]	Analyte List -HMBD	2110	HMBD	6498	TRUE	33978	53672	55456	5366	7224	5948
4.83	137.046	136.039	[M+H]+	4.47836	TRUE	Hypoxanthine	C5H4N4O					[]	Analyte List -HMBD	2100	HMBD	0	TRUE	1882	1814	2284	0	0	0
9.01	118.065	117.058	[M+H]+	-0.249697	TRUE	Indole	C8H7N					[]	Analyte List -HMBD	2120	HMBD	9806	TRUE	7840	6530	8478	7602	9044	9640
8	148.075	147.068	[M+H]+, [M-H2O+H]+	-1.11455	TRUE	Indole-3-carbinol	C9H9NO					[]	Analyte List -HMBD	2020	HMBD	5978	TRUE	9284	8250	12610	693740	681338	638750
8.04	162.056	161.048	[M+H]+	3.6109	TRUE	Indole-3-carboxylic acid	C9H7NO2					[]	Analyte List -HMBD	2220	HMBD	1546	TRUE	3050	2484	3482	1358	1546	1788
6.13	188.071	187.064	[M+H]+, [M-H2O+H]+	2.19961	TRUE	Indoleacrylic acid	C11H9NO2					[]	Analyte List -HMBD	2110	HMBD	11274	TRUE	12296	11274	13352	2768	3186	0
9.65	269.093	268.086	[M+H]+	-2.68388	TRUE	Inosine	C10H12N4O5					[]	Analyte List -HMBD	1110	HMBD	2526	TRUE	5940	4602	7430	0	0	780
0.82	89.0599	88.0526	[M+H]+	1.93635	TRUE	Isobutyric acid	C4H8O2					[]	Analyte List -HMBD	2120	HMBD	47714	TRUE	41920	41052	42432	47714	55830	58712
0.88	193.043	192.036	[M+H]+	4.10024	TRUE	Isocitric acid	C6H8O7					[]	Analyte List -HMBD	1220	HMBD	2870	TRUE	4774	4604	4900	2866	3260	3840
8.23	195.063	194.055	[M+H]+	-4.11638	TRUE	Isoferulic acid	C10H10O4					[]	Analyte List -HMBD	1200	HMBD	2640	TRUE	6360	6636	7112	3066	2986	2640
24.07	152.057	151.05	[M+H]+	1.72257	TRUE	Isoguanine	C5H5N5O					[]	Analyte List -HMBD	2000	HMBD	2682	TRUE	2886	2524	2426	2624	2858	2238
6.25	246.17	245.163	[M+H]+	0.496695	TRUE	Isovalerylcarnitine	C12H23NO4					[]	Analyte List -HMBD	2220	HMBD	3636	TRUE	1956	1838	2238	7398	7012	8502
2.29	180.042	179.035	[M+H]+	4.27611	TRUE	Isoxanthopterin	C6H5N5O2					[]	Analyte List -HMBD	1220	HMBD	0	TRUE	0	0	0	10812	16560	14482
6.49	190.05	189.043	[M+H]+, [M-H2O+H]+	1.35898	TRUE	Kynurenic acid	C10H7NO3					[]	Analyte List -HMBD	2010	HMBD	3568	TRUE	3568	2312	3244	266	226	0
7.2	204.124	203.117	[M+H]+	-1.9693	TRUE	L-Acetylcarnitine	C9H17NO4					[]	Analyte List -HMBD	2110	HMBD	26594	TRUE	27018	27510	26594	11162	11406	13038
5.44	281.107	280.099	[M+H]+	0.655768	TRUE	L-Aspartyl-L-phenylalanine	C13H16N2O5					[]	Analyte List -HMBD	1210	HMBD	12904	TRUE	5290	4646	4060	5242	5584	6046
7.2	148.062	147.055	[M+H]+	-3.657	TRUE	L-Glutamic acid	C5H9NO4					[]	Analyte List -HMBD	2100	HMBD	3328	TRUE	3328	3498	3476	1280	1696	1794
9.29	147.083	146.076	[M+H]+	0.532626	TRUE	L-Glutamine	C5H10N2O3					[]	Analyte List -HMBD	1120	HMBD	3524	TRUE	1018	1364	810	2750	3752	3158
1.08	269.063	268.055	[M+H]+	1.05057	TRUE	L-Homocystine	C8H16N2O4S2					[]	Analyte List -HMBD	2220	HMBD	1572	TRUE	14756	13832	15118	0	0	0
14.41	281.248	280.24	[M+H]+, [M+H]+, [M+H]+	0.498615	TRUE	Linoleic acid	C18H32O2					[YELLOW]	Analyte List -HMBD	2010	HMBD	5434	TRUE	5332	5794	5382	6342	5426	5022
12.82	206.064	205.057	[M+H]+	2.21954	TRUE	Lipoamide	C8H15NOS2					[]	Analyte List -HMBD	1100	HMBD	1298	TRUE	1118	1562	1208	6722	6352	5902
4.47	135.03	134.023	[M+H]+	3.70608	TRUE	L-Malic acid	C4H6O5					[]	Analyte List -HMBD	2100	HMBD	892	TRUE	856	0	892	0	1494	1124
5.29	166.086	165.079	[M+H]+, [M+Na]+, [M+H]+	-0.233834	TRUE	L-Phenylalanine	C9H11NO2					[]	Analyte List -HMBD	2220	HMBD	240694	TRUE	60546	52646	53408	4338	0	4782
1.44	116.071	115.063	[M+H]+, [M+H]+, [M-H2O+H]+	0.881801	TRUE	L-Proline	C5H9NO2					[]	Analyte List -HMBD	2200	HMBD	1426	TRUE	1580	1536	1188	190	96	204
16.33	205.087	204.09	[M+H]+	0.354559	TRUE	L-Tryptophan	C11H12N2O2					[]	Analyte List -HMBD	1120	HMBD	5782	TRUE	5546	5926	4464	10074	8682	9648
1.51	118.086	117.079	[M+H]+, [M+Na]+	1.7202	TRUE	L-Valine	C5H11NO2					[]	Analyte List -HMBD	2220	HMBD	288	TRUE	184	944	0	232	0	490
3.39	165.055	164.047	[M+H]+, [M-H2O+H]+	0.157747	TRUE	m-Coumaric acid	C9H8O3					[]	Analyte List -HMBD	2110	HMBD	1870	TRUE	1870	1740	1560	0	0	0
14.47	345.242	344.234	[M+H]+	-2.07675	TRUE	Medroxyprogesterone	C22H32O3					[]	Analyte List -HMBD	2100	HMBD	1252	TRUE	1324	1300	1354	1298	1308	1598
9.62	233.132	232.125	[M+H]+	0.311186	TRUE	Melatonin	C13H16N2O2					[]	Analyte List -HMBD	1110	HMBD	47664	TRUE	47664	49664	48512	2898	3240	2968
2.47	166.048	165.041	[M+H]+	0.203349	TRUE	Methionine sulfoxide	C5H11NO3S					[]	Analyte List -HMBD	1100	HMBD	0	TRUE	1200	1342	1226	0	0	0
1.16	136.041	135.034	[M+H]+	-1.47538	TRUE	Methylcysteine	C4H9NO2S					[]	Analyte List -HMBD	2200	HMBD	1334	TRUE	2722	2606	3402	1106	682	1228
7.63	194.081	193.073	[M+H]+	-3.2279	TRUE	Methylhippuric acid	C10H11NO3					[]	Analyte List -HMBD	2220	HMBD	10618	TRUE	10618	10492	11410	10422	10368	11138
7.2	149.074	148.067	[M+H]+	-3.14645	TRUE	Mevalonic acid	C6H12O4					[]	Analyte List -HMBD	1020	HMBD	6706	TRUE	1684	1974	1768	8798	6706	7694
5.72	122.097	121.089	[M+H]+	2.15249	TRUE	N,N-Dimethylaniline	C8H11N					[]	Analyte List -HMBD	2200	HMBD	1504	TRUE	1504	1070	1200	27932	27318	25296
6.12	74.0602	73.053	[M+H]+, [M-H2O+H]+	3.23258	TRUE	N,N-Dimethylformamide	C3H7NO					[]	Analyte List -HMBD	2120	HMBD	108172	TRUE	108172	115058	126820	4708	4970	5996
5.72	190.072	189.065	[M+H]+	-4.03281	TRUE	N-Acetylglutamic acid	C7H11NO5					[]	Analyte List -HMBD	2110	HMBD	910	TRUE	520	910	616	3166	0	2776
9.52	208.097	207.09	[M+H]+	1.91566	TRUE	N-Acetyl-L-phenylalanine	C11H13NO3					[]	Analyte List -HMBD	2120	HMBD	1330	TRUE	978	1170	1330	1620	1198	1744
9.86	224.082	223.075	[M+H]+	-3.4872	TRUE	N-Acetyl-L-tyrosine	C11H13NO4					[]	Analyte List -HMBD	1110	HMBD	10596	TRUE	37272	39868	40116	0	626	572
1.28	131.118	130.111	[M+H]+	0.437474	TRUE	N-Acetylputrescine	C6H14N2O					[]	Analyte List -HMBD	2200	HMBD	242	TRUE	192	270	124	1326	1170	1390
6.76	219.113	218.106	[M+H]+	0.881674	TRUE	N-Acetylserotonin	C12H14N2O2					[]	Analyte List -HMBD	2220	HMBD	3312	TRUE	1350	1322	1882	5082	4698	5294
20.32	666.136	665.129	[M+H]+	-0.0254838	TRUE	NADH	C21H29N7O14P2					[]	Analyte List -HMBD	1000	HMBD	1610	TRUE	1532	1860	1506	1522	0	1546
6.89	231.111	230.104	[M+H]+	3.04458	TRUE	Naproxen	C14H14O3					[]	Analyte List -HMBD	1110	HMBD	954	TRUE	962	802	802	1482	1170	1228
8.96	273.085	272.078	[M+H]+	0.648734	TRUE	Naringenin	C15H12O5					[]	Analyte List -HMBD	1210	HMBD	1090	TRUE	9092	10892	10368	1090	1190	1260
8.57	254.085	253.078	[M+H]+	-2.18851	TRUE	Neopterin	C9H11N5O4					[]	Analyte List -HMBD	1110	HMBD	0	TRUE	0	0	230	94740	109408	104850
12.08	178.05	177.043	[M+H]+	0.585219	TRUE	N-Formyl-L-methionine	C6H11NO3S					[]	Analyte List -HMBD	1120	HMBD	5090	TRUE	14146	12504	12264	1344	1562	1750
2.23	123.055	122.047	[M+H]+	-4.28376	TRUE	Niacinamide	C6H6N2O					[]	Analyte List -HMBD	2220	HMBD	1158	TRUE	9656	9712	9350	0	0	0
1.32	170.081	169.074	[M+H]+	1.45958	TRUE	Norepinephrine	C8H11NO3					[]	Analyte List -HMBD	2220	HMBD	320	TRUE	320	0	0	4148	4614	4614
6.62	184.095	183.088	[M+H]+	-1.82036	TRUE	Normetanephrine	C9H13NO3					[]	Analyte List -HMBD	2110	HMBD	0	TRUE	0	0	0	2400	2448	3336
20.29	413.268	390.279	[M+Na]+, [M+H]+, [M+K]+	0.256227	TRUE	Nutriacholic acid	C24H38O4					[]	Analyte List -HMBD	2120	HMBD	34182	FALSE	37972	38214	44720	27546	28006	25300
18.4	337.236	314.246	[M+Na]+, [M+H]+	2.03798	TRUE	Octadecanedioic acid	C18H34O4					[]	Analyte List -HMBD	2110	HMBD	6768	TRUE	6766	6312	7402	5726	6668	6250
7.58	346.116	345.108	[M+H]+	-4.23685	TRUE	Omeprazole	C17H19N3O3S					[]	Analyte List -HMBD	1010	HMBD	0	TRUE	0	0	0	44020	49360	49016
0.87	157.018	156.01	[M+H]+	-4.40114	TRUE	Orotic acid	C5H4N2O4					[]	Analyte List -HMBD	1220	HMBD	0	TRUE	0	7114	0	0	45918	0
3.4	182.081	181.074	[M+H]+	0.258331	TRUE	o-Tyrosine	C9H11NO3					[]	Analyte List -HMBD	2120	HMBD	1972	TRUE	2780	1498	1658	0	0	0
7.86	147.03	146.023	[M+H]+	-3.5152	TRUE	Oxoglutaric acid	C5H6O5					[]	Analyte List -HMBD	2100	HMBD	0	TRUE	0	248	0	4850	3924	4042
5.6	220.118	219.111	[M+H]+, [M+Na]+, [M-H2O+H]+	1.03756	TRUE	Pantothenic acid	C9H17NO5					[]	Analyte List -HMBD	2020	HMBD	2260	TRUE	1884	1740	1956	1056	996	1130
18.45	734.57	733.563	[M+H]+	0.879199	TRUE	PC(16:0/16:0)	C40H80NO8P					[]	Analyte List -HMBD	2000	HMBD	378	TRUE	0	0	0	4950	2222	0
8.66	189.089	166.1	[M+Na]+, [M+H]+	1.02534	TRUE	Perillic acid	C10H14O2					[]	Analyte List -HMBD	2110	HMBD	3586	TRUE	31160	32406	27964	45342	44334	51650
16.41	153.128	152.12	[M+H]+	0.952313	TRUE	Perillyl alcohol	C10H16O					[]	Analyte List -HMBD	2020	HMBD	4310	TRUE	28612	39084	34054	4972	4602	4448
12.44	121.065	120.058	[M+H]+	0.375837	TRUE	Phenylacetaldehyde	C8H8O					[]	Analyte List -HMBD	2110	HMBD	2686	TRUE	1762	2238	2454	2508	5276	3952
9.3	137.06	136.052	[M+H]+	-0.584334	TRUE	Phenylacetic acid	C8H8O2					[]	Analyte List -HMBD	2220	HMBD	298	TRUE	1862	1680	1710	13262	12446	18536
6.1	194.079	193.072	[M+H]+, [M+H]+, [M+H]+	-1.57052	TRUE	Phenylacetylglycine	C10H11NO3					[]	Analyte List -HMBD	1210	HMBD	331148	TRUE	331148	334368	333886	29884	33324	32560
0.98	162.984	139.994	[M+Na]+, [M+K]+	-1.71435	TRUE	Phosphonoacetate	C2H5O5P					[]	Analyte List -HMBD	1210	HMBD	2040	TRUE	1190	1656	1544	3264	2040	2492
0.83	98.9754	97.9681	[M+H]+	-0.580751	TRUE	Phosphoric acid	H3O4P					[]	Analyte List -HMBD	1210	HMBD	265992	TRUE	199618	198492	204042	265992	327548	393388
5.9	153.052	152.045	[M+H]+	-2.78944	TRUE	p-Hydroxyphenylacetic acid	C8H8O3					[]	Analyte List -HMBD	1220	HMBD	3318	TRUE	4156	3884	3318	550	644	414
2.2	124.04	123.032	[M+H]+	1.63852	TRUE	Picolinic acid	C6H5NO2					[]	Analyte List -HMBD	2220	HMBD	3534	TRUE	4474	4398	3718	0	482	0
6.15	130.086	129.079	[M+H]+	0.708086	TRUE	Pipecolic acid	C6H11NO2					[]	Analyte List -HMBD	2120	HMBD	99588	TRUE	43864	42310	40832	141120	150102	144144
20.34	59.0494	58.0421	[M+H]+	4.56887	TRUE	Propanal	C3H6O					[]	Analyte List -HMBD	2100	HMBD	1510	TRUE	0	0	1510	24988	1604	1736
9.64	260.164	259.157	[M+H]+, [M-H2O+H]+	-0.0344231	TRUE	Propranolol	C16H21NO2					[]	Analyte List -HMBD	2220	HMBD	58292	TRUE	59548	58292	64246	8260	8768	8340
0.82	78.0228	154.031	[M+H+H]2+	-0.818579	TRUE	Protocatechuic acid	C7H6O4					[]	Analyte List -HMBD	1120	HMBD	27346	TRUE	0	14358	11572	27346	32150	30320
18.47	80.0496	79.0423	[M+H]+, [M+H]+	0.253029	TRUE	Pyridine	C5H5N					[]	Analyte List -HMBD	2120	HMBD	19392	TRUE	16250	21252	19392	16936	18308	18514
5.77	168.068	167.061	[M+H]+	-3.12718	TRUE	Pyridoxal	C8H9NO3					[]	Analyte List -HMBD	1110	HMBD	3842	TRUE	4026	3842	4690	788	294	164
1.89	248.034	247.027	[M+H]+	-1.2847	TRUE	Pyridoxal 5'-phosphate	C8H10NO6P					[]	Analyte List -HMBD	1210	HMBD	4532	TRUE	3804	3562	3098	6602	7334	7484
5.36	169.097	168.09	[M+H]+	-0.402392	TRUE	Pyridoxamine	C8H12N2O2					[]	Analyte List -HMBD	2020	HMBD	9586	TRUE	5662	4826	6468	10952	11414	9586
1.42	81.0448	80.0375	[M+H]+	0.772913	TRUE	Pyrimidine	C4H4N2					[]	Analyte List -HMBD	2000	HMBD	1334	TRUE	1334	1454	0	0	0	0
15.1	111.044	110.037	[M+H]+	-1.26718	TRUE	Pyrocatechol	C6H6O2					[]	Analyte List -HMBD	2110	HMBD	240	TRUE	3310	4470	3790	192	212	166
2.44	130.05	129.043	[M+H]+, [M+H]+	0.67346	TRUE	Pyroglutamic acid	C5H7NO3					[]	Analyte List -HMBD	2120	HMBD	404	TRUE	2886	3046	3040	0	110	0
10.85	73.0285	72.0212	[M+H]+	1.6749	TRUE	Pyruvaldehyde	C3H4O2					[]	Analyte List -HMBD	2000	HMBD	1158	TRUE	4264	4420	3826	890	798	814
10.82	174.055	173.048	[M+H]+	1.32911	TRUE	Quinaldic acid	C10H7NO2					[]	Analyte List -HMBD	2120	HMBD	0	TRUE	180	0	0	6660	5304	6006
9.47	193.062	192.054	[M+H]+	-2.05088	TRUE	Quinic acid	C7H12O6					[]	Analyte List -HMBD	1100	HMBD	1926	TRUE	1182	912	810	830	1926	1436
4.74	165.066	164.059	[M+H]+	-0.41052	TRUE	Rhamnose	C6H12O5					[]	Analyte List -HMBD	1100	HMBD	922	TRUE	646	1322	922	1740	1160	1118
6.94	377.147	376.14	[M+H]+	3.4445	TRUE	Riboflavin	C17H20N4O6					[]	Analyte List -HMBD	2220	HMBD	10326	TRUE	5550	5274	5786	10584	10326	10382
8.67	287.104	286.097	[M+H]+	0.664111	TRUE	Salicin	C13H18O7					[]	Analyte List -HMBD	1010	HMBD	3824	TRUE	3378	3640	3824	6912	6464	6830
12.43	304.158	303.15	[M+H]+	-0.529709	TRUE	Scopolamine	C17H21NO4					[]	Analyte List -HMBD	1100	HMBD	0	TRUE	0	0	0	2392	2846	2232
0.89	211.073	210.065	[M+H]+	-3.66551	TRUE	Sedoheptulose	C7H14O7					[]	Analyte List -HMBD	1100	HMBD	0	TRUE	1650	1538	1706	0	0	0
6.52	238.09	237.083	[M+H]+	-0.0811656	TRUE	Sepiapterin	C9H11N5O3					[]	Analyte List -HMBD	1110	HMBD	0	TRUE	0	0	0	8124	9444	10596
7.43	177.103	176.096	[M+H]+	3.10619	TRUE	Serotonin	C10H12N2O					[]	Analyte List -HMBD	2100	HMBD	652	TRUE	110	0	0	1184	1520	1704
4.77	183.077	182.07	[M+H]+	2.86606	TRUE	Sorbitol	C6H14O6					[]	Analyte List -HMBD	1110	HMBD	5468	TRUE	5468	5762	5688	444	718	614
11.86	302.306	301.299	[M+H]+	2.29176	TRUE	Sphinganine	C18H39NO2					[]	Analyte List -HMBD	2120	HMBD	5322	TRUE	3762	4458	5514	4514	5574	6058
17.57	300.29	299.283	[M+H]+	1.90645	TRUE	Sphingosine	C18H37NO2					[]	Analyte List -HMBD	2110	HMBD	7736	TRUE	7288	6646	8670	6420	6832	7188
19.04	159.065	158.058	[M+H]+	0.450417	TRUE	Succinylacetone	C7H10O4					[]	Analyte List -HMBD	2010	HMBD	19150	TRUE	21600	19192	15834	19150	18890	17546
15	80.9736	79.9664	[M+H]+, [M-H2O+H]+	-1.37558	TRUE	Sulfite	O3S					[]	Analyte List -HMBD	1000	HMBD	16274	TRUE	16274	16708	16496	66994	73762	83928
10.23	266.121	265.114	[M+H]+	4.61361	TRUE	Thiamine	C12H17N4OS					[]	Analyte List -HMBD	2010	HMBD	0	TRUE	0	0	0	23516	22442	23044
8.71	243.088	242.081	[M+H]+	-0.50692	TRUE	Thymidine	C10H14N2O5					[]	Analyte List -HMBD	1120	HMBD	33900	TRUE	14484	13754	13898	31618	31306	36240
4.51	127.05	126.043	[M+H]+	0.892981	TRUE	Thymine	C5H6N2O2					[]	Analyte List -HMBD	2200	HMBD	1668	TRUE	11128	10090	11454	1772	924	1152
6.35	195.059	194.052	[M+H]+	-0.725996	TRUE	Trans-Ferulic acid	C10H10O4					[]	Analyte List -HMBD	1120	HMBD	1012	TRUE	46556	49788	53078	1430	1582	1388
10.07	229.143	228.136	[M+H]+	-0.171512	TRUE	Traumatic acid	C12H20O4					[]	Analyte List -HMBD	2200	HMBD	1868	TRUE	15754	14072	390	1590	1596	1868
1.07	60.081	59.0737	[M+H]+	4.24398	TRUE	Trimethylamine	C3H9N					[]	Analyte List -HMBD	2200	HMBD	2616	TRUE	1246	1288	1346	10636	12188	10962
8.67	76.0762	75.0689	[M+H]+, [M-H2O+H]+	1.18036	TRUE	Trimethylamine N-oxide	C3H9NO					[]	Analyte List -HMBD	2120	HMBD	4424	TRUE	8710	10122	11260	0	0	0
5.53	161.106	160.099	[M+H]+	3.24798	TRUE	Tryptamine	C10H12N2					[]	Analyte List -HMBD	2220	HMBD	2352	TRUE	2352	3374	2546	1180	0	1372
9.29	162.091	161.084	[M+H]+, [M+Na]+	1.58936	TRUE	Tryptophanol	C10H11NO					[]	Analyte List -HMBD	2220	HMBD	43480	TRUE	64968	71772	72306	708236	667276	603140
7.14	163.033	162.026	[M+H]+	-1.18311	TRUE	Umbelliferone	C9H6O3					[]	Analyte List -HMBD	1000	HMBD	0	TRUE	1688	1766	2182	352	0	220
6.75	133.068	132.061	[M+H]+	-2.61183	TRUE	Ureidopropionic acid	C4H8N2O3					[]	Analyte List -HMBD	1120	HMBD	1130	TRUE	7264	9188	9536	4224	4808	0
12.92	245.079	244.071	[M+H]+	2.00245	TRUE	Uridine	C9H12N2O6					[]	Analyte List -HMBD	2010	HMBD	26330	TRUE	17148	15118	16432	44316	40202	45858
20.21	608.096	607.089	[M+H]+, [M+H]+	-0.176165	TRUE	Uridine diphosphate-N-acetylglucosamine	C17H27N3O17P2					[]	Analyte List -HMBD	1000	HMBD	2160	TRUE	1772	1972	0	1830	2118	1884
2.24	139.05	138.043	[M+H]+, [M-H2O+H]+	1.39488	TRUE	Urocanic acid	C6H6N2O2					[]	Analyte List -HMBD	2210	HMBD	3344	TRUE	10162	8780	8384	1036	1208	1464
5.9	285.092	284.085	[M+H]+	-0.8689	TRUE	Xanthosine	C10H12N4O6					[]	Analyte List -HMBD	1110	HMBD	3564	TRUE	3852	3564	3766	0	0	0
11.89	206.044	205.037	[M+H]+	-4.47585	TRUE	Xanthurenic acid	C10H7NO4					[]	Analyte List -HMBD	2100	HMBD	5660	TRUE	59898	57680	58532	0	0	0
