# Supplementary material for: Mass spectrometric analysis of bioactive conditioned media of bacteria isolated from reptilian gut
Source: Future Sci OA. 2023 May 2;9(5):FSO861. doi: 10.2144/fsoa-2023-0030 (PMC10167718; doi:10.2144/fsoa-2023-0030)
Supplement: Supplementary file 2 [file fsoa-09-861-s2.xlsx]

## Sheet: Supplemetary_table_2_Differenti
	FC	log2(FC)	p.ajusted
Phenylacetylglycine	0.095825	-3.3834	6.7049e-07	6.1736
Deoxyuridine	0.0055777	-7.4861	9.4341e-06	5.0253
3-Methylindole	32.204	5.0091	9.4341e-06	5.0253
Melatonin	0.062438	-4.0014	9.4341e-06	5.0253
Niacinamide	0.19535	-2.3559	9.4341e-06	5.0253
Xanthurenic acid	0.19651	-2.3473	9.4341e-06	5.0253
DL-Homocystine	0.19679	-2.3453	9.4341e-06	5.0253
Thiamine	5.1245	2.3574	1.2489e-05	4.9035
Homoveratric acid	0.19463	-2.3612	1.8555e-05	4.7315
Pyroglutamic acid	0.017165	-5.8644	2.1843e-05	4.6607
Dextromethorphan	0.19356	-2.3692	2.8314e-05	4.548
N-Acetyl-L-tyrosine	0.011193	-6.4813	2.9275e-05	4.5335
Acetaminophen	0.025468	-5.2952	2.9275e-05	4.5335
Sorbitol	0.10498	-3.2519	2.9275e-05	4.5335
Indole-3-carbinol	66.807	6.0619	3.4067e-05	4.4677
2-Octenoic acid	0.19449	-2.3622	3.6438e-05	4.4384
3,4,5-Trimethoxycinnamic acid	0.12978	-2.9458	3.8997e-05	4.409
Pipecolic acid	3.4279	1.7773	3.8997e-05	4.409
Xanthosine	0.19124	-2.3866	4.24e-05	4.3726
1,3-Dimethyluric acid	5.2421	2.3901	4.533e-05	4.3436
1,3,5-Trimethoxybenzene	3.6372	1.8628	4.533e-05	4.3436
Deoxyinosine	299.2	8.225	4.8636e-05	4.313
Deoxyadenosine	4.0954	2.034	5.0682e-05	4.2951
N,N-Dimethylaniline	21.342	4.4156	5.1482e-05	4.2883
L-Homocystine	0.18989	-2.3968	5.5429e-05	4.2563
Benzocaine	39.415	5.3007	6.3651e-05	4.1962
Alpha-Aspartyl-lysine	31.872	4.9942	6.3651e-05	4.1962
5-Hydroxytryptophol	15.646	3.9677	6.3651e-05	4.1962
Propranolol	0.13932	-2.8435	6.3651e-05	4.1962
Cytidine	5.2304	2.3869	6.3651e-05	4.1962
Sedoheptulose	0.18856	-2.4069	7.559e-05	4.1215
Cis,cis-Muconic acid	0.14526	-2.7833	7.5864e-05	4.12
2-Hydroxyphenethylamine	5.2066	2.3803	7.5864e-05	4.12
Trans-Ferulic acid	0.029447	-5.0857	7.687e-05	4.1142
Cinnamic acid	0.13068	-2.9359	7.687e-05	4.1142
5-Hydroxy-L-tryptophan	0.18751	-2.415	7.687e-05	4.1142
5-Methoxytryptophan	5.3103	2.4088	7.687e-05	4.1142
Guaifenesin	4.4136	2.142	7.687e-05	4.1142
Norepinephrine	29.857	4.9	8.9111e-05	4.0501
Neopterin	959.62	9.9063	9.5665e-05	4.0192
L-Acetylcarnitine	0.43892	-1.188	9.7202e-05	4.0123
Methionine sulfoxide	0.19108	-2.3877	9.8615e-05	4.0061
2-Aminobenzoic acid	23.442	4.551	0.00010907	3.9623
Omeprazole	5.3913	2.4306	0.00010965	3.96
Trimethylamine	8.7077	3.1223	0.00013719	3.8627
Cyclohexanone	0.050474	-4.3083	0.00014465	3.8397
N,N-Dimethylformamide	0.044776	-4.4811	0.0001486	3.828
Alpha-ketoisovaleric acid	18.608	4.2179	0.0001513	3.8202
Thymine	0.11778	-3.0859	0.0001583	3.8005
Tryptophanol	9.4652	3.2426	0.00017746	3.7509
3-Nitrotyrosine	12.796	3.6777	0.00017836	3.7487
N-Formyl-L-methionine	0.11965	-3.0631	0.00017836	3.7487
Aniline	0.1834	-2.4469	0.00017836	3.7487
L-Phenylalanine	0.05995	-4.0601	0.00018702	3.7281
Pyruvaldehyde	0.2	-2.3219	0.00018726	3.7276
Benzenebutanoic acid	16.424	4.0377	0.00018808	3.7257
Lipoamide	4.8807	2.2871	0.00018808	3.7257
3,5-Dimethoxyphenol	25.056	4.6471	0.00022623	3.6454
Benzamide	0.30579	-1.7094	0.00022967	3.6389
4-Aminophenol	0.19908	-2.3286	0.0002496	3.6027
Diphenhydramine	0.059789	-4.064	0.00025365	3.5958
Naringenin	0.11663	-3.1	0.00025365	3.5958
3-Indolepropionic acid	5.5386	2.4695	0.00025365	3.5958
1,3,7-Trimethyluric acid	0.18317	-2.4488	0.00025365	3.5958
Cytidine monophosphate	0.18519	-2.4329	0.00025365	3.5958
1,11-Undecanedicarboxylic acid	5.0804	2.3449	0.00026384	3.5787
Deoxyguanosine	0.1103	-3.1805	0.00027923	3.554
m-Coumaric acid	0.18104	-2.4656	0.00028414	3.5465
11a-Hydroxyprogesterone	0.37385	-1.4195	0.00028414	3.5465
Gamma-terpinene	0.070008	-3.8363	0.00028462	3.5457
3,4-Dihydroxyphenylglycol	0.038045	-4.7161	0.00030008	3.5228
Uridine	2.6772	1.4207	0.00030896	3.5101
Quinaldic acid	71.31	6.156	0.00032458	3.4887
Isoferulic acid	0.43227	-1.21	0.00032749	3.4848
Picolinic acid	0.053598	-4.2217	0.00035174	3.4538
Urocanic acid	0.13569	-2.8816	0.0003809	3.4192
N-Acetylputrescine	6.6314	2.7293	0.00038548	3.414
Oxoglutaric acid	36.912	5.206	0.00040231	3.3954
N-Acetylserotonin	3.3101	1.7269	0.00040231	3.3954
Allyl isothiocyanate	0.17649	-2.5024	0.00042732	3.3692
3-Hydroxymethylglutaric acid	0.1829	-2.4508	0.00045358	3.3433
Cysteamine	167.55	7.3884	0.00051777	3.2859
2-Hydroxyadenine	8.4778	3.0837	0.00051777	3.2859
4,5-Dihydroorotic acid	5.9922	2.5831	0.00051777	3.2859
Benzaldehyde	44.338	5.4705	0.00052621	3.2788
p-Hydroxyphenylacetic acid	0.14157	-2.8204	0.00052664	3.2785
Isovalerylcarnitine	3.7984	1.9254	0.00061536	3.2109
1-Methyladenosine	9.3145	3.2195	0.00066585	3.1766
Sulfite	4.5411	2.183	0.00066702	3.1759
Pyridoxal	0.09922	-3.3332	0.00067095	3.1733
Thymidine	2.3534	1.2348	0.00067095	3.1733
Trimethylamine N-oxide	0.17367	-2.5256	0.00079773	3.0981
Scopolamine	5.578	2.4797	0.00080735	3.0929
3-Methyl-2-oxovaleric acid	0.18139	-2.4628	0.00080735	3.0929
Hypoxanthine	0.18201	-2.4579	0.00080735	3.0929
L-Glutamic acid	0.46302	-1.1109	0.00080735	3.0929
Glycylproline	3.0462	1.607	0.00080866	3.0922
Pyrocatechol	0.049265	-4.3433	0.00084516	3.0731
Sepiapterin	5.7779	2.5306	0.00084516	3.0731
Estrone	5.7149	2.5147	0.00085341	3.0688
5'-Methylthioadenosine	0.10373	-3.2691	0.00085862	3.0662
Pyridoxal 5'-phosphate	2.047	1.0335	0.00087391	3.0585
5-Methoxytryptamine	2.5339	1.3414	0.00093344	3.0299
Alpha-Terpineol	14.833	3.8908	0.00094666	3.0238
Indoleacrylic acid	0.17625	-2.5043	0.001091	2.9622
Cinnamaldehyde	3.5748	1.8379	0.0011001	2.9586
L-Proline	0.11385	-3.1348	0.0011196	2.951
2-Hydroxycaproic acid	0.09847	-3.3442	0.0011382	2.9438
Adenine	0.41317	-1.2752	0.0011456	2.941
Mevalonic acid	4.2753	2.096	0.0011721	2.931
Perillyl alcohol	0.13781	-2.8593	0.0011843	2.9265
Umbelliferone	0.1093	-3.1937	0.001286	2.8908
Daidzein	0.17425	-2.5207	0.0013966	2.8549
Serotonin	28.623	4.8391	0.0014235	2.8467
3-Phenoxypropionic acid	106.3	6.7321	0.0014508	2.8384
Homocysteine	0.3446	-1.537	0.001487	2.8277
Guanidoacetic acid	6.0702	2.6017	0.0017423	2.7589
Allantoic acid	2.7794	1.4748	0.0018156	2.741
17a-Ethynylestradiol	2.7195	1.4433	0.0022545	2.6469
Kynurenic acid	0.058878	-4.0861	0.0028664	2.5427
Normetanephrine	5.6833	2.5067	0.0029842	2.5252
Hippuric acid	0.10267	-3.2839	0.003034	2.518
Isoxanthopterin	6.4518	2.6897	0.0035666	2.4478
12-Hydroxydodecanoic acid	0.034885	-4.8413	0.0036335	2.4397
Glycerophosphocholine	0.16777	-2.5755	0.003651	2.4376
Phenylacetic acid	8.4242	3.0745	0.003843	2.4153
Inosine	0.060761	-4.0407	0.0041012	2.3871
5-Methoxytryptophol	8.957	3.163	0.0045245	2.3444
L-Glutamine	3.0263	1.5976	0.0045245	2.3444
Methylcysteine	0.34548	-1.5333	0.0047357	2.3246
Hyodeoxycholic acid	0.12954	-2.9485	0.0057893	2.2374
Betaine	0.12084	-3.0488	0.0063613	2.1965
Protocatechuic acid	3.18	1.669	0.009043	2.0437
2-Isopropylmalic acid	2.9367	1.5542	0.017503	1.7569
o-Tyrosine	0.15142	-2.7234	0.019753	1.7044
Tryptamine	0.33704	-1.569	0.024395	1.6127
Ureidopropionic acid	0.38005	-1.3957	0.026645	1.5744
